# Supplementary material for: Characterization of Circulating Androgens, Cortisol and Estrogens During Normal, Abnormal and False Pregnancy in Bottlenose Dolphins (Tursiops truncatus) Under Managed Care
Source: Frontiers journal article supplement (doi:10.3389/fmars.2021.737926), 2021-11-22
Supplement: Data_Sheet_2.docx [file Data_Sheet_2.docx]

**Supplemental Table 1** Model statistics from the restricted maximum likelihood linear mixed model (LMM) analysis of hormone concentrations within each status and time variable. A Likelihood ratio test (LR Test) was used to first determine if a 2- (animal id, random intercept variable) or 3-level (pregnancy id) LMM was appropriate for use with the model*. The final model (FM) was tested to confirm that a mixed model was improved over a simple a linear regression using an LR Test (MM LR Test). The significance of the final model was tested using a Wald χ2 Test. All final models were square root or log transformed as indicated by residual analysis. P: Pregnancy; Open: not pregnant; NP: normal pregnancy; FTT: failure to thrive; PNL: perinatal loss; EL: early loss; FP: false pregnancy. MPC: month post conception. NA: not applicable. NS: not significant. PE: physiologic event which includes stage of pregnancy, follicular phase, ovulation and luteal phase. Test: only results which indicated a 3-level model was significantly improved are presented. *2 vs 3 LR.

|  | **Independent variable** | | | | | |
| --- | --- | --- | --- | --- | --- | --- |
| **Analysis** | **Testosterone** | | **Androstenedione** | | **Cortisol** | |
|  | **Model using stage** | **Model using MPC** | **Model using stage** | **Model using MPC** | **Model using stage** | **Model using MPC** |
| **NP vs PE**  2 vs 3 LR Test:  MM LR Test:  FM F Stat: | NS  χ2 = 39, P < 0.0001  F11,241 = 28, P < 0.0001 | NS  χ2 = 45, P < 0.0001  F17,179 = 17, P < 0.0001 | NS  χ2 = 3.7, P = 0.003  F11,194 = 34, P < 0.0001 | NS  χ2 = 5.6, P = 0.009  F11,156 = 31, P < 0.0001 | NS  χ2 = 73, P < 0.0001  F11,241 = 2.6, P = 0.02 | NS  χ2 = 73, P < 0.0001  F11,241 = 2.3, P = 0.003 |
| **FTT**  2 vs 3 LR Test:  MM LR Test:  FM F Stat: | NS  χ2 = 61, P < 0.0001  F10,241 = 26, P < 0.0001 | NS  χ2 = 59, P < 0.0001  F30,270 = 13, P < 0.0001 | NS  χ2 = 17, P < 0.0001  F10,190 = 51, P < 0.0001 | NS  χ2 = 17, P < 0.0001  F30,237 = 30, P < 0.0001 | NS  χ2 = 62, P < 0.0001  F10,211 = 3.3, P = 0.0005 | NS  χ2 = 71, P < 0.0001  F30,240 = 2.42, P = 0.0001 |
| **PNL**  2 vs 3 LR Test:  MM LR Test:  FM F Stat: | NS  χ2 = 60, P < 0.0001  F10,238 = 25, P < 0.0001 | NS  χ2 = 59, P < 0.0001  F30,270 = 13, P < 0.0001 | NS  χ2 = 43, P < 0.0001  F10,233 = 38, P < 0.0001 | NS  χ2 = 48, P < 0.0001  F30,270 = 20, P < 0.0001 | NS  χ2 = 71, P < 0.0001  F10,214 = 4.0, P < 0.0001 | NS  χ2 = 82, P < 0.0001  F30,270 = 2.3, P = 0.0002 |
| **EL**  2 vs 3 LR Test:  MM LR Test:  FM: Wald: | χ2 = 14.2, P = 0.0002  χ2 = 57, P < 0.0001  F6,50 = 0.8, P = 0.58 | χ2 = 4.4, P = 0.036  χ2 = 43, P < 0.0001  F14,177 = 2.5, P = 0.003 | NS  χ2 = 41, P < 0.0001  F6,50 = 0.99, P = 044 | χ2 = 9.6, P = 0.002  χ2 = 53, P < 0.0001  F14,90 = 2.6, P = 0.004 | NS  χ2 = 38, P < 0.0001  F6,73 = 2.4, P = 0.04 | NS  χ2 = 37, P < 0.0001  F14,76 = 1.7, P = 0.08 |
| **FP**  2 vs 3 LR Test:  MM LR Test:  FM F Stat: | NS  χ2 = 66, P < 0.0001  F10,235 = 18, P < 0.0001 | NS  χ2 = 68, P < 0.0001  F26,846 = 301, P < 0.0001 | NS  χ2 = 10, P < 0.0001  F10,167 = 48, P < 0.0001 | NS  χ2 = 13.8, P = 0.0001  F26,227= 27, P < 0.0001 | NS  χ2 = 91, P < 0.0001  F10,483 = 2.1, P = 0.03 | χ2 = 4.6, P = 0.032  χ2 = 95, P < 0.0001  F26,440 = 41.4, P = 0.1 |

**Supplemental Table 2** Model statistics from the restricted maximum likelihood linear mixed model (LMM) analysis of hormone concentrations within each status and time variable. A Likelihood ratio test (LR Test) was used to first determine if a 2- (animal id, random intercept variable) or 3-level (pregnancy id) LMM was appropriate for use with the model*. The Final model (FM) was tested to confirm that a mixed model was improved over a simple a linear regression using an LR Test (MM LR Test). The significance of the final model was tested using a Wald χ2 Test. All final models were square root or log transformed as indicated by residual analysis. P: Pregnancy; Open: not pregnant; NP: normal pregnancy; FTT: failure to thrive; PNL: perinatal loss; EL: early loss; FP: false pregnancy. MPC: month post conception. NA: not applicable. NS: not significant. PE: physiologic event which includes stage of pregnancy, follicular phase, ovulation and luteal phase. Test: only results which indicated a 3-level model was significantly improved are presented. *2 vs 3 LR.

|  | **Independent variable** | | | |
| --- | --- | --- | --- | --- |
| **Analysis** | **Serum Estradiol** | | **Serum Estrone conjugates** | |
|  | **Model using stage** | **Model using MPC** | **Model using stage** | **Model using MPC** |
| **NP vs PE**  2 vs 3 LR Test:  MM LR Test:  FM F Stat: | χ2 = 38, P < 0.0001  χ2 = 209, P < 0.0001  F11,239 = 6.5, P < 0.0001 | NS  χ2 = 170, P < 0.0001  F17,179 = 1.78, P = 0.03 | χ2 = 47, P < 0.0001  χ2 = 262, P < 0.0001  F11,239 = 12, P < 0.0001 | NS  χ2 = 195, P < 0.0001  F17,449 = 2.12, P = 0.006 |
| **FTT**  2 vs 3 LR Test:  MM LR Test:  FM F Stat: | χ2 = 11, P = 0.0008  χ2 = 243, P < 0.0001  F10,140 = 2.1, P = 0.03 | χ2 = 9.3, P = 0.002  χ2 = 230, P < 0.0001  F30,222 = 11.6, P = 0.028 | χ2 = 11, P = 0.0008  χ2 = 294, P < 0.0001  F10,137 = 3.6, P =0.0003 | χ2 = 10.1, P = 0.002  χ2 = 273, P < 0.0001  F30,560 = 1.9, P = 0.0025 |
| **PNL**  2 vs 3 LR Test:  MM LR Test:  FM F Stat: | NS  χ2 = 241, P < 0.0001  F10,736 = 2.5, P = 0.007 | NS  χ2 = 82, P < 0.0001  F30,719 = 2.1, P = 0.0007 | NS  χ2 = 310, P < 0.0001  F10,741 = 4.5, P < 0.0001 | NS  χ2 = 292, P < 0.0001  F30,550 = 2.3, P = 0.0001 |
| **EL**  2 vs 3 LR Test:  MM LR Test:  FM F Stat: | NS  χ2 = 152, P < 0.0001  F6,86 = 2.3, P = 0.04 | NS  χ2 = 133, P < 0.0001  F14,124 = 1.1, P = 0.34 | NS  χ2 = 174, P < 0.0001  F6,60 = 1.2, P = 0.27 | NS  χ2 = 154, P < 0.0001  F14,88 = 1.5, P = 0.34 |
| **FP**  2 vs 3 LR Test:  MM LR Test:  FM F Stat: | NS  χ2 = 280, P < 0.0001  F10,110 = 5.4, P < 0.0001 | NS  χ2 = 247, P < 0.0001  F29,028 = 2.5, P = 0.0001 | NS  χ2 = 312, P < 0.0001  F10,183 = 4.9, P < 0.0001 | NS  χ2 = 277, P < 0.0001  F29,028 = 2.6, P = 0.0001 |

**Supplemental Table 3** Significant variables from the final model for the analysis of androgen and cortisol hormone concentrations. Hormone data were analyzed by both gestational stage and month post conception/ovulation (MPC/MPO) for all reproductive events including normal pregnancy (NORM), failure to thrive (FTT), perinatal loss (PNL), early loss (EL) and false pregnancy (FP). NS = not significant.

| **Reproductive outcome** | **Testosterone** | | **Androstenedione** | | **Cortisol** | |
| --- | --- | --- | --- | --- | --- | --- |
|  | **Model using stage** | **Model using MPC/MPO** | **Model using stage** | **Model using MPC/MPO** | **Model using stage** | **Model using MPC/MPO** |
| **NORM**  Stage or MPC:  Status:  Season:  Age:  Method: | χ2 = 289, P < 0.0001  NS  χ2 = 9.8, P = 0.02  NS  NS | NS  NS  NS  NS  NS | χ2 = 289, P < 0.0001  NS  NS  NS  NS | χ2 = 512, P < 0.0001  NS  NS  NS  χ2 = 5.6, P = 0.02 | χ2 = 289, P < 0.0001  NS  NS  NS  NS | χ2 = 32, P = 0.0013  NS  NS  NS  NS |
| **FTT**  Stage or MPC:  Status:  Season:  Age:  Method: | χ2 = 140, P < 0.0001  NS  χ2 = 11.5, P = 0.009  NS  NS | χ2 = 26, P < 0.0001  NS  χ2 = 10.6, P = 0.014  NS  NS | χ2 = 140, P < 0.0001  χ2 = 5.48, P = 0.02  NS  NS  NS | χ2 = 573, P < 0.0001  NS  NS  NS  NS | χ2 = 7.3, P = 0.03  χ2 = 8.33, P = 0.004  χ2 = 7.7, P = 0.05  NS  NS | NS  χ2 = 5.32, P = 0.021  χ2 = 9.4, P = 0.005  NS  NS |
| **PNL**  Stage or MPC:  Status:  Season:  Age:  Method: | χ2 = 157, P < 0.0001  NS  NS  NS  NS | χ2 = 385, P < 0.0001  NS  NS  NS  NS | χ2 = 245, P < 0.0001  NS  NS  NS  NS | χ2 = 385, P < 0.0001  NS  NS  NS  NS | χ2 = 9.5, P = 0.009  χ2 = 10, P = 0.002  χ2 = 8.1, P = 0.045  NS  NS | χ2 = 29.7, P = 0.003  χ2 = 6.2, P = 0.013  NS  NS  NS |
| **EL**  Stage or MPC:  Status:  Season:  Age:  Method: | NS  NS  NS  NS  NS | χ2 = 157, P < 0.0001  χ2 = 157, P < 0.0001  NS  NS  NS | NS  NS  NS  NS  NS | χ2 = 29.6, P < 0.0001  NS  NS  NS  NS | χ2 = 4, P = 0.045  NS  NS  NS  χ2 = 4.1, P = 0.044 | NS  NS  NS  NS  NS |
| **FP**  Stage or MPC:  Status:  Season:  Age:  Method: | χ2 = 395, P < 0.0001  χ2 = 8.7, P < 0.0001  NS  NS  χ2 = 5.6, P = 0.018 | χ2 = 231, P < 0.0001  χ2 = 186, P < 0.0001  NS  NS  NS | χ2 = 395, P < 0.0001  χ2 = 87, P < 0.0001  NS  NS  χ2 = 5.6, P = 0.018 | χ2 = 887, P < 0.0001  χ2 = 145, P < 0.0001  NS  NS  χ2 = 4.3, P = 0.039 | χ2 = 15, P = 0.0005  NS  NS  NS  NS | NS  NS  NS  NS  NS |

**Supplemental Table 4** Significant variables from the final model for the analysis of estrogen hormone concentrations. Hormone data were analyzed by both gestational stage and month post conception/ovulation (MPC/MPO) for all reproductive events including normal pregnancy (NORM), failure to thrive (FTT), perinatal loss (PNL), early loss (EL) and false pregnancy (FP). NS = not significant.

| **Reproductive outcome** | **Serum Estradiol** | | **Serum Estrone conjugates** | |
| --- | --- | --- | --- | --- |
|  | **Model using stage** | **Model using MPC/MPO** | **Model using stage** | **Model using MPC/MPO** |
| **NORM**  Stage or MPC:  Status:  Season:  Age:  Method: | χ2 = 289, P < 0.0001  NS  χ2 = 10.1, P = 0.018  NS  NS | χ2 = 22, P = 0.035  NS  NS  NS  NS | χ2 = 118, P < 0.0001  NS  NS  NS  NS | χ2 = 35, P = 0.0004  NS  NS  NS  NS |
| **FTT**  Stage or MPC:  Status:  Season:  Age:  Method: | χ2 = 26, P < 0.0001  NS  NS  NS  NS | χ2 = 41, P < 0.0001  NS  NS  NS  NS | χ2 = 157, P < 0.0001  NS  NS  NS  NS | χ2 = 245, P < 0.0001  NS  NS  NS  NS |
| **PNL**  Stage or MPC:  Status:  Season:  Age:  Method: | χ2 = 12.5, P = 0.002  χ2 = 4, P = 0.044  NS  χ2 = 8.5, P = 0.004  χ2 = 6.5, P = 0.011 | χ2 = 25, P = 0.01  χ2 = 4.7, P = 0.03  NS  χ2 = 13.3, P = 0.003  χ2 = 10.1, P = 0.001 | χ2 = 24, P < 0.0001  χ2 = 3.9, P = 0.049  NS  χ2 = 10.1, P = 0.0015  NS | χ2 = 42, P = 0.0001  NS  NS  χ2 = 12.1, P = 0.0005  χ2 = 3.9, P = 0.047 |
| **EL**  Stage or MPC:  Status:  Season:  Age:  Method: | χ2 = 8.81, P = 0.003  NS  NS  NS  NS | NS  NS  NS  NS  NS | χ2 = 11.13, P = 0.025  NS  NS  NS  NS | NS  NS  NS  NS  NS |
| **FP**  Stage or MPC:  Status:  Season:  Age:  Method: | χ2 = 17, P = 0.0002  χ2 = 7.3, P = 0.027  χ2 = 18.9, P = 0.0003  NS  NS | χ2 = 23.8, P < 0.0001  NS  χ2 = 20.1, P = 0.0002  χ2 = 37, P = 0.05  NS | χ2 = 26.8, P = 0.0002  χ2 = 12, P = 0.0004  NS  NS  NS | χ2 = 37.7, P < 0.0001  NS  NS  NS  NS |

**Supplemental Table 5** Back-transformed marginal mean (*95%* *CI*) testosterone and androstenedione concentrations (ng/ml) during each month post conception/ovulation (MPC or MPO) for abnormal (failure to thrive [FTT], perinatal loss [PNL], early loss [EL]) pregnancies or false pregnancy (FP).

|  | Testosterone (T) | | | | Androstenedione (A4) | | | |
| --- | --- | --- | --- | --- | --- | --- | --- | --- |
| MPC/MPO | FTT | PNL | EL | FP | FTT | PNL | EL | FP |
| 0 | 0.35  (*0.06 to 0.87*) | 0.2  (*0 to 0.7*) | 0.22  (*0.01 to 0.7*) | 0.94  (*0.41 to 1.66*) | 2.02  (*1.2 to 3.41*) | 1.15  (*0.49 to 2.66*) | 0.28  (*0 to 1.13*) | 1.86  (*1.27 to 2.73*) |
| 1 | 0.51  (*0.21 to 0.94*) | 0.16  (*0 to 0.54*) | 1.14  (*0.64 to 1.79*) | 0.73  (*0.36 to 1.23*) | 1.96  (*1.36 to 2.81*) | 0.59  (*0.32 to 1.08*) | 0.42  (*0.08 to 1.03*) | 1.71  (*1.3 to 2.26*) |
| 2 | 0.67  (*0.25 to 1.28*) | 0.54  (*0.2 to 1.04*) | 1.02  (*0.56 to 1.61*) | 0.98  (*0.53 to 1.57*) | 1.8  (*1.17 to 2.77*) | 0.78  (*0.45 to 1.33*) | 0.5  (*0.12 to 1.14*) | 2.18  (*1.61 to 2.96*) |
| 3 | 0.55  (*0.18 to 1.13*) | 0.85  (*0.38 to 1.51*) | 1.01  (*0.5 to 1.7*) | 1.18  (*0.69 to 1.8*) | 2.34  (*1.57 to 3.47*) | 2.97  (*1.7 to 5.18*) | 0.39  (*0.05 to 1.07*) | 1.73  (*1.3 to 2.3*) |
| 4 | 2.01  (*1.2 to 3.03*) | 0.55  (*0.11 to 1.31*) | 1.07  (*0.35 to 2.17*) | 0.87  (*0.34 to 1.65*) | 5.98  (*3.9 to 9.17*) | 3.68  (*1.76 to 7.69*) | 0.52  (*0.02 to 1.73*) | 1.73  (*1.12 to 2.69*) |
| 5 | 1.73  (*1 to 2.67*) | 1.49  (*0.6 to 2.78*) |  | 1.17  (*0.58 to 1.99*) | 9.8  (*6.65 to 14.45*) | 8.16  (*4.45 to 14.96*) |  | 2.46  (*1.16 to 3.75*) |
| 6 | 0.94  (*0.33 to 1.86*) | 0.67  (*0.03 to 2.14*) |  | 0.57  (*0.10 to 1.44*) | 8.28  (*4.67 to 14.68*) | 5.73  (*1.77 to 18.56*) |  | 1.45  (*0.75 to 2.8*) |
| 7 | 3.45  (*2.25 to 4.9*) | 2.02  (*1.11 to 3.19*) |  | 0.71  (*0.18 to 1.59*) | 25.24  (*15.99 to 39.85*) | 16.63  (*9.33 to 29.63*) |  | 1.74  (*1 to 3.02*) |
| 8 | 3.05  (*2.14 to 4.13*) | 3.55  (*1.89 to 5.72*) |  | 0.45  (*0.11 to 1.01*) | 28.22  (*19.31 to 41.24*) | 30.12  (*13.79 to 65.81*) |  | 1.92  (*1.19 to 3.08*) |
| 9 | 3.46  (*2.48 to 4.61*) | 3  (*1.9 to 4.36*) |  | 0.48  (*0.04 to 1.43*) | 26.22  (*17.12 to 40.15*) | 19.19  (*12.19 to 30.19*) |  | 2.3  (*1.06 to 4.98*) |
| 10 | 4.25  (*2.77 to 6.04*) | 1.99  (*0.9 to 3.49*) |  | 0.02  (*-0.63 to 1.11*) | 14.33  (*8.53 to 24.06*) | 10.94  (*5.78 to 20.69*) |  | 2.86  (*0.98 to 8.37*) |
| 11 | 4.5  (*2.29 to 7.46*) | 3.56  (*2.02 to 5.53*) |  |  | 18.93  (*8.36 to 42.86*) | 13.21  (*7.4 to 23.55*) |  |  |
| 12 | 3.6  (*2.13 to 5.47*) | 2.14  (*1.25 to 3.26*) |  |  | 8.82  (*4.96 to 15.67*) | 6.28  (*4.03 to 9.78*) |  |  |

**Supplemental Table 6** Back-transformed marginal mean (*95%* *CI*) cortisol concentrations (ng/ml) during each month post conception/ovulation (MPC or MPO) for abnormal (failure to thrive [FTT], perinatal loss [PNL], early loss [EL]) pregnancies or false pregnancy (FP).

|  | Cortisol | | | |
| --- | --- | --- | --- | --- |
| MPC/MPO | FTT | PNL | EL | FP |
| 0 | 8.03  (*3.44 to 18.97*) | 10.56  (*4.11 to 27.15*) | 3.16  (*1.35 to 7.37*) | 3.21  (*1.7 to 6.06*) |
| 1 | 5.44  (*2.87 to 10.3*) | 10.57  (*5.11 to 21.86*) | 5.73  (*2.86 to 11.48*) | 3.33  (*1.9 to 5.84*) |
| 2 | 5.61  (*2.6 to 12.12*) | 6.8  (*3.69 to 12.55*) | 3.33  (*1.59 to 6.97*) | 4.11  (*2.26 to 7.48*) |
| 3 | 5  (*2.3 to 10.89*) | 6.54  (*3.42 to 12.5*) | 4.72  (*1.52 to 14.64*) | 2.52  (*1.42 to 4.49*) |
| 4 | 6.97  (*3.15 to 15.42*) | 4.2  (*1.77 to 9.97*) |  | 3.49  (*1.69 to 7.21*) |
| 5 | 6.75  (*3.23 to 14.09*) | 6.6  (*2.72 to 16.04*) |  | 11.31  (*5.28 to 24.22*) |
| 6 | 1.48  (*0.54 to 4.06*) | 5.32  (*2.01 to 14.09*) |  | 3.66  (*1.17 to 11.44*) |
| 7 | 18.31  (*8 to 41.89*) | 10.39  (*4.88 to 22.09*) |  | 3.27  (*1.41 to 7.6*) |
| 8 | 8.36  (*4.31 to 16.24*) | 12.17  (*4.72 to 31.34*) |  | 4.72  (*2.37 to 9.41*) |
| 9 | 8.31  (*3.99 to 17.31*) | 11.61  (*5.66 to 24.06*) |  | 6.92  (*2.28 to 20.98*) |
| 10 | 13.15  (*5.22 to 33.11*) | 13.3  (*5.91 to 29.95*) |  | 5.67  (*1.89 to 17.06*) |
| 11 | 25.8  (*6.27 to 106.15*) | 18.3  (*6.75 to 49.62*) |  |  |
| 12 | 44.03  (*15.87 to 122.12*) | 23.66  (*11.27 to 49.64*) |  |  |

**Supplemental Table 7** Back-transformed marginal mean (*95%* *CI*) estradiol and estrone conjugate concentrations (ng/ml) during each month post conception/ovulation (MPC or MPO) for abnormal (failure to thrive [FTT], perinatal loss [PNL], early loss [EL]) pregnancies or false pregnancy (FP).

|  | Estradiol (E2) | | | | Estrone conjugate (EC) | | | |
| --- | --- | --- | --- | --- | --- | --- | --- | --- |
| MPC/MPO | FTT | PNL | EL | FP | FTT | PNL | EL | FP |
| 0 | 0.47  (*0.28 to 0.82*) | 0.51  (*0.3 to 0.89*) | 0.42  (*0.25 to 0.7*) | 0.35  (*0.23 to 0.53*) | 0.58  (*0.38 to 0.9*) | 0.65  (*0.38 to 1.1*) | 0.61  (*0.39 to 0.95*) | 0.42  (*0.26 to 0.66*) |
| 1 | 0.45  (*0.28 to 0.71*) | 0.55  (*0.33 to 0.9*) | 0.38  (*0.24 to 0.61*) | 0.32  (*0.21 to 0.48*) | 0.5  (*0.34 to 0.75*) | 0.68  (*0.42 to 1.11*) | 0.51  (*0.34 to 0.76*) | 0.36  (*0.23 to 0.56*) |
| 2 | 0.43  (*0.26 to 0.71*) | 0.61  (*0.39 to 0.95*) | 0.3  (*0.19 to 0.47*) | 0.37  (*0.25 to 0.54*) | 0.55  (*0.36 to 0.84*) | 0.62  (*0.4 to 0.96*) | 0.45  (*0.3 to 0.67*) | 0.37  (*0.24 to 0.58*) |
| 3 | 0.3  (*0.18 to 0.51*) | 0.62  (*0.39 to 0.99*) | 0.29  (*0.17 to 0.5*) | 0.39  (*0.26 to 0.57*) | 0.37  (*0.24 to 0.58*) | 0.85  (*0.53 to 1.34*) | 0.52  (*0.33 to 0.82*) | 0.35  (*0.23 to 0.54*) |
| 4 | 0.41  (*0.25 to 0.68*) | 0.48  (*0.28 to 0.81*) | 0.31  (*0.19 to 0.51*) | 0.38  (*0.24 to 0.61*) | 0.46  (*0.3 to 0.71*) | 0.71  (*0.42 to 1.19*) | 0.59  (*0.39 to 0.91*) | 0.35  (*0.21 to 0.6*) |
| 5 | 0.41  (*0.26 to 0.66*) | 0.69  (*0.39 to 1.21*) |  | 0.38  (*0.25 to 0.58*) | 0.51  (*0.33 to 0.76*) | 0.78  (*0.45 to 1.33*) |  | 0.37  (*0.23 to 0.59*) |
| 6 | 0.44  (*0.27 to 0.72*) | 0.68  (*0.36 to 1.27*) |  | 0.32  (*0.18 to 0.56*) | 0.49  (*0.31 to 0.76*) | 0.86  (*0.48 to 1.56*) |  | 0.37  (*0.2 to 0.69*) |
| 7 | 0.52  (*0.32 to 0.83*) | 0.54  (*0.33 to 0.9*) |  | 0.33  (*0.2 to 0.53*) | 0.61  (*0.4 to 0.93*) | 0.66  (*0.4 to 1.07*) |  | 0.49  (*0.3 to 0.82*) |
| 8 | 0.58  (*0.37 to 0.9*) | 0.57  (*0.31 to 1.05*) |  | 0.32  (*0.21 to 0.49*) | 0.65  (*0.43 to 0.96*) | 0.72  (*0.41 to 1.29*) |  | 0.42  (*0.27 to 0.68*) |
| 9 | 0.57  (*0.37 to 0.87*) | 0.78  (*0.47 to 1.27*) |  | 0.26  (*0.15 to 0.44*) | 0.66  (*0.45 to 0.97*) | 1.09  (*0.67 to 1.77*) |  | 0.4  (*0.23 to 0.69*) |
| 10 | 0.64  (*0.4 to 1.02*) | 0.53  (*0.31 to 0.91*) |  | 0.42  (*0.18 to 0.98*) | 0.73  (*0.46 to 1.15*) | 0.78  (*0.46 to 1.32*) |  | 0.54  (*0.27 to 1.11*) |
| 11 | 0.57  (*0.33 to 0.99*) | 0.57  (*0.3 to 1.06*) |  |  | 0.66  (*0.36 to 1.22*) | 0.76  (*0.42 to 1.36*) |  |  |
| 12 | 0.51  (*0.31 to 0.81*) | 0.89  (*0.53 to 1.48*) |  |  | 0.6  (*0.36 to 0.99*) | 1.12  (*0.68 to 1.85*) |  |  |
